# Supplementary material for: A Highly Thermostable In2O3/ITO Thin Film Thermocouple Prepared via Screen Printing for High Temperature Measurements
Source: Sensors (Basel). 2018 Mar 23;18(4):958. doi: 10.3390/s18040958 (PMC5948799; doi:10.3390/s18040958)
Supplement: Supplementary file 1 [file sensors-18-00958-s001.pdf]

# Supplementary materials for

## A Highly Thermostable In<sub>2</sub>O<sub>3</sub>/ITO Thin Film Thermocouple Prepared via Screen Printing for High Temperature Measurements

Yantao Liu <sup>1,3</sup>, Wei Ren <sup>1,\*</sup>, Peng Shi <sup>1,\*</sup>, Dan Liu<sup>1</sup>, Yijun Zhang <sup>1</sup>, Ming Liu <sup>1</sup>, Zuo-Guang Ye <sup>1,4</sup>, Weixuan Jing <sup>2</sup>, Bian Tian <sup>2</sup>, and Zhuangde Jiang <sup>2</sup>

<sup>1</sup> *Electronic Materials Research Laboratory, Key Laboratory of the Ministry of Education & International Center for Dielectric Research, Xi'an Jiaotong University, Xi'an 710049, China*

<sup>2</sup> *International Joint Laboratory for Micro/Nano Manufacturing and Measurement Technologies, Xi'an Jiaotong University, Xi'an 710049, China*

<sup>3</sup> *Department of Electronic Engineering, Xi'an University of Technology, Xi'an 710048, China*

<sup>4</sup> *Department of Chemistry and 4D LABS, Simon Fraser University, Burnaby, BC V5A 1S6, Canada*

\* Corresponding authors' E-mail addresses: wren@mail.xjtu.edu.cn and spxjy@mail.xjtu.edu.cn, Tel.: +86-29-82665670

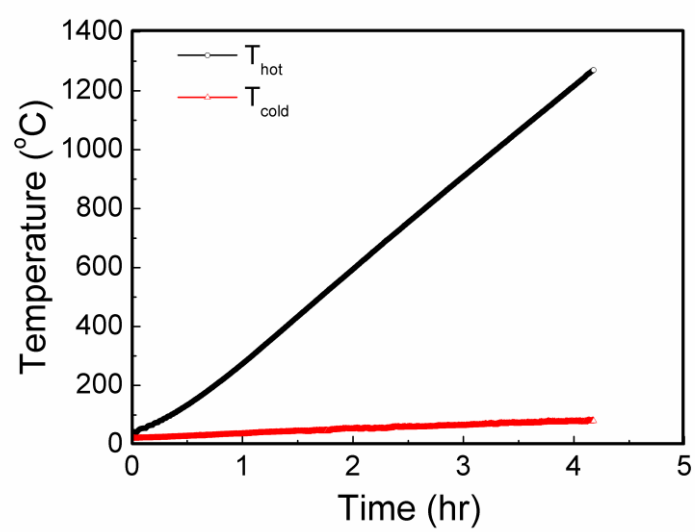

**Figure S1.** The temperature changes of the cold and hot junctions of thermocouple in the heating process.

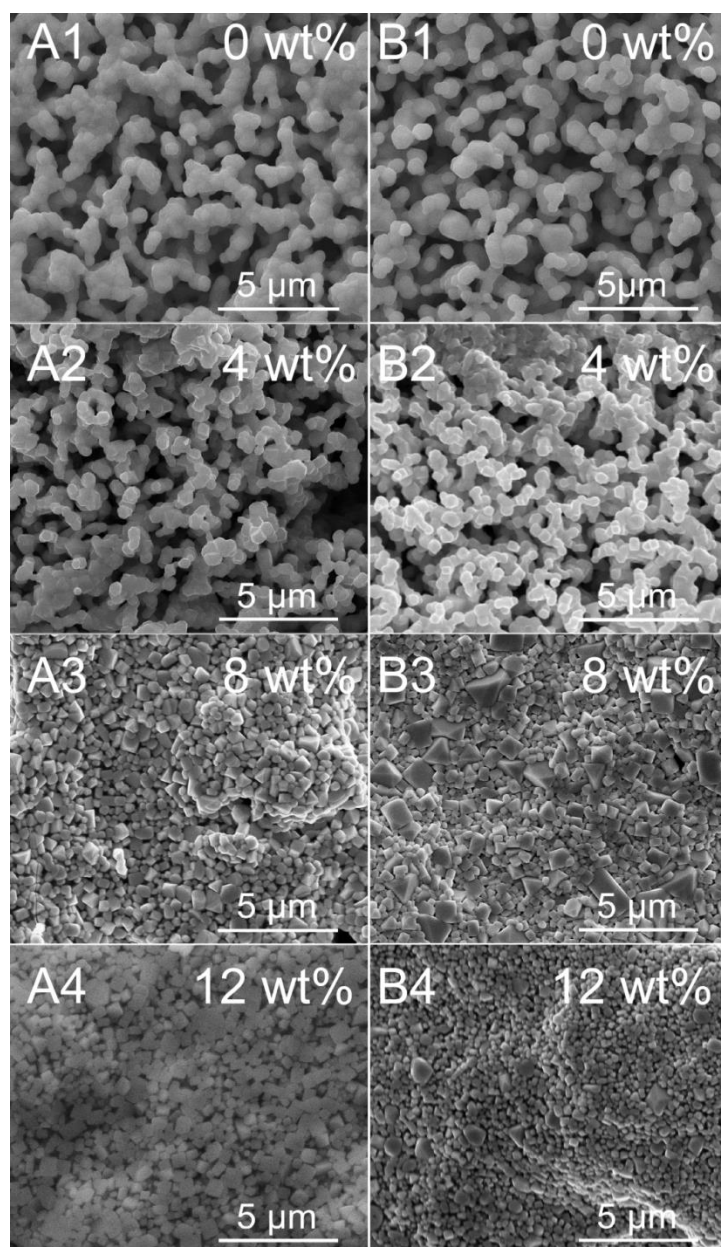

**Figure S2.** SEM surface images of ITO and  $\text{In}_2\text{O}_3$  films with different glass additives annealed at 1250 °C for 2 h. (A) ITO film, (B)  $\text{In}_2\text{O}_3$  film.
